1  
2  
3  
4  
5  
6  
7  
8  
9  
10  
11  
12  
13  
14  
15  
16  
17  
18  
19  
20  
21  
22  
23

**Can immunosuppressed mice control oral infection by the opportunistic pathogen**

***Encephalitozoon intestinalis*?**

***Encephalitozoon intestinalis* infection in immunosuppressed mice**

Maria Lucia da Costa Moura<sup>a</sup>, Anuska Marcelino Alvares-Saraiva<sup>a</sup>, Elizabeth Cristina Pérez<sup>a</sup>, José  
Guilherme Xavier<sup>a</sup>, Diva Denelle Spadacci-Morena<sup>b</sup>, Carla Renata Serantoni Moyses<sup>a</sup>, Paulo  
Ricardo Dell’Armeline Rocha<sup>a</sup>, Maria Anete Lallo<sup>a\*</sup>

<sup>a</sup>Programa de Pós-Graduação em Patologia Ambiental e Experimental, Universidade Paulista  
(UNIP), Rua José Maria Whitaker 290, CEP 04057–000, São Paulo, SP, Brasil

<sup>b</sup>Departamento de Fisiopatologia, Instituto Butantan, Av. Vital Brasil 1500, CEP 05503–900, São  
Paulo, SP, Brasil

\*Corresponding author: Maria Anete Lallo – [maria.lallo@docente.unip.br](mailto:maria.lallo@docente.unip.br) or  
[anetelallo@hotmail.com](mailto:anetelallo@hotmail.com)

24

## 25 **Abstract**

26 Intestinal mucosa (IM), or the outer surface of the intestine, serves at the primary site for the  
27 interaction of various pathogens that cause infection via the oral route. Thus, IM is crucial for  
28 developing an efficient adaptive immune response against pathogenic micro-organisms, thereby  
29 preventing their colonization and subsequent infection. In the present study, we investigated the  
30 immune response to *Encephalitozoon intestinalis*-caused infection in the IM and gut-associated  
31 lymphoid tissue (GALT) in C57BL/6 female mice. To mimic an immunosuppressive condition, the  
32 mice were treated with cyclophosphamide (Cy). Histopathology revealed lymphoplasmacytic  
33 enteritis at 7 and 14 days-post-infection (dpi) in all infected groups; however, inflammation  
34 diminished at 21 and 28 dpi. Cy treatment also led to a higher number of *E. intestinalis* spores and  
35 lesions, which reduced at 28 dpi. In addition, flow cytometry analysis demonstrated CD4<sup>+</sup> and  
36 CD8<sup>+</sup> T cells to be predominant immune cells, with a significant increase in both Th1 and Th2  
37 cytokines at 7 and 14 dpi, as demonstrated by histopathology. In conclusion, Cy treatment reduced  
38 GALT (Peyer's plaques and mesenteric lymph nodes) and peritoneum populations but increased the  
39 T-cell population in the intestinal mucosa and the production of pro-inflammatory cytokines, which  
40 were able to eliminate this opportunistic fungus and reduced the infection.

41

42 **Keywords:** *Encephalitozoon intestinalis*, microsporidia, mucosal immunity, intestinal inflammation

43

## 44 **Introduction**

45 Microsporidia are spore-forming intracellular pathogens, responsible for causing opportunistic  
46 infections in immunocompromised people, such as those with HIV infection and AIDS, cancer  
47 patients or individuals with autoimmune diseases taking immunosuppressive drugs, and in elderly  
48 and children (1-4). Two species are responsible for gastrointestinal infections: *Enterocytozoon*

49 *bieneusi* and *Encephalitozoon intestinalis* (5). Both microsporidia are transmitted by the oral route  
50 and cause abdominal cramping, diarrhea, malabsorption, and weight loss in patients with AIDS (6).  
51 *E. intestinalis* also infects and develops inside intestinal macrophages, allowing the infection to  
52 spread from the intestine to other organs (7). A very limited number of drugs are available for  
53 treating intestinal microsporidiosis; these include albendazole and fumagillin, which are at least  
54 partially effective in reducing the parasite count (2,7). A strong immune response of an individual is  
55 mainly responsible for controlling the pathogen. The compartmentalized response against *E.*  
56 *intestinalis* infection is primarily mediated by CD8<sup>+</sup> and CD4<sup>+</sup> T cells together with interferon  
57 (IFN) and interleukin (IL)-12 cytokines (8,9).  
58 The intestinal mucosa (IM) acts as a host to a variable microflora, which plays an important role in  
59 nutrition absorption and immune function, among others. The immune response of the IM plays a  
60 critical role in maintaining the commensal homeostasis and protecting the host against pathogens  
61 (10,11). The immune response of IM against *E. cuniculi* infection is majorly mediated by antigen-  
62 specific intraepithelial lymphocytes (IELs) (12). Considering the entry point of microsporidia to be  
63 intestinal mucosa, there is a lack of knowledge of local immunity, especially in individuals on  
64 immunosuppressive medications.  
65 The past decade has witnessed a surge in the use of immunosuppressive drugs for the treatment of  
66 neoplastic and autoimmune disease patients, as well as in patients undergoing transplantation.  
67 Cyclophosphamide (Cy) is one such immunosuppressive drug that has been recommended by the  
68 World Health Organization (WHO) and is on the list of drugs most frequently used by the Public  
69 and Private Health Systems owing to its efficacy, cost-effectiveness, and lesser side-effects than  
70 other drugs with similar actions, such as dexamethasone (13). Cy is primarily used against  
71 autoimmune and alloimmune diseases (14,15), in treating patients undergoing transplantation, such  
72 as bone marrow recipients (16) and in cancer treatment (17,18).  
73 Cyclophosphamide is a cytotoxic alkylating agent that binds to DNA; its major effects on the body  
74 include cellular apoptosis and myelosuppression, and decreased lymphocyte, neutrophil, red blood

75 cell, and platelet count. However, it also possesses immunomodulatory effects, which have not yet  
76 been clarified, such as (i) expansion of antigen-specific T cells, (ii) expansion of T cell-specific  
77 cytokines (IFNs, IL-7, and IL-15), (iii) decrease in regulatory T cells (Treg), and (iv) increased  
78 mobilization of dendritic cells from bone marrow, with activation of intracellular machinery for  
79 antigen processing and presentation (19). Thus, this anticancer agent is known for inducing  
80 immunogenic cancer cell death, subverting immunosuppressive T cells, and promoting Th1 and  
81 Th17 cells that control cancer outgrowth (20, 21).

82 We have shown previously Cy to suppress the immune system of mice; intraperitoneal infection of  
83 mice with *E. cuniculi* resulted in a disseminated, acute, and fatal encephalitozoonosis. These results  
84 were associated with the immunosuppressive effects of Cy (22). This study was designed to  
85 describe how the immunosuppressive effects of cyclophosphamide compromise the intestinal  
86 immune response against *E. intestinalis*, one of the most prevalent microsporidia in opportunistic  
87 infections in humans. Herein, we show a higher number of CD8<sup>+</sup> and CD4<sup>+</sup> T lymphocytes in IM in  
88 association with pro-inflammatory cytokines to be responsible for resolution of *E. intestinalis*  
89 infection in both Cy immunosuppressed and immunocompetent mice, despite the  
90 immunosuppressive activity of Cy observed in cells populations of Peyer's plaques, mesenteric  
91 lymph nodes, peritoneum and even part of the immune population of the IM.

92

## 93 **Results**

94 **Immunosuppressed mice showed transitory enteritis with fast resolution.** All infected mice  
95 survived the oral infection by *E. intestinalis*, with no evidence of symptoms and macroscopic  
96 lesions in the gut. Microscopically, lymphoplasmacytic enteritis was observed in infected animals  
97 (*infected* and *Cy-infected*), mostly affecting the duodenum and ileum, especially at 7 and 14 dpi  
98 (Fig. 1a, b). In addition to the inflammatory infiltrate, mucosal ulceration caused exposure of the  
99 underlying lamina propria (Fig. 1b), apical and mural multifocal necrosis, and villus-based  
100 epithelial proliferation. At 21 and 28 dpi, young cells and an increased number of mitoses were

101 observed in the small intestine, suggesting a restoration of tissue integrity, via resolution of the  
102 inflammatory process and tissue remodeling. *E. intestinalis* spore clusters were observed on the  
103 glandular base (Fig. 1c), with a higher fungal burden observed in the *Cy-infected* than the *infected*  
104 (Fig. 1d) group. However, in both groups, the fungal burden and the lesions progressively decreased  
105 from 7 to 28 dpi (Fig. 1d). No *E. intestinalis* spores were observed in uninfected mice. Thus,  
106 infection by *E. intestinalis* via oral route caused lymphoplasmacytic enteritis, accompanied by  
107 favorable proliferation in both immunosuppressed and non-immunosuppressed groups; however,  
108 the fungal burden was higher in the *Cy-treated* mice. Macroscopically, the infection led to the  
109 enlargement of the spleen and intestinal lymph nodes in the infected animals.

110

111 **CD8<sup>+</sup> T lymphocytes increased in intestinal mucosa in infected mice.** The *infected* and *Cy-*  
112 *infected* groups showed a significant increase in CD8<sup>+</sup> T lymphocyte population as compared to  
113 controls at 7, 14, and 28 dpi (Fig. 2). This is in line with a previous study that demonstrated CD4<sup>+</sup> T  
114 and CD8<sup>+</sup> T lymphocyte subpopulations to play a substantive role in protecting against peroral  
115 infection of *E. intestinalis* (8). Another study reported a significant increase in the CD8αα subset of  
116 IELs in response to oral *E. cuniculi* infection (12).

117 Immunosuppressive therapy with *Cy* could not cause a significant difference in CD8<sup>+</sup> T lymphocyte  
118 population among the infected mice. Moreover, CD8<sup>+</sup> T lymphocyte population witnessed a 10-  
119 time decrease, when compared 7 with 28 dpi (Supplementary Fig. 1). Together, the results showed  
120 that CD8<sup>+</sup> T lymphocyte peak was observed at 7 dpi and was associated with a high number of *E.*  
121 *intestinalis* spores and lymphoplasmacytic enteritis. At the same time, there was a gradual reduction  
122 in the CD8<sup>+</sup> T cell population, fungal burden, and histological lesions in infected (*infected* and *Cy-*  
123 *infected*) animals at 14, 21, and 28 dpi, indicating the resolution of infection in both  
124 immunosuppressed and non-immunosuppressed groups. The treatment with *Cy* resulted in a  
125 significant increase in the CD4<sup>+</sup> T lymphocyte population in the uninfected group. In addition,  
126 *infected* and *Cy-infected* groups also showed an increase in this population at 14 and 28 dpi as

127 compared to the untreated control (Fig. 2), suggesting that *E. intestinalis* stimulated CD4<sup>+</sup> T  
128 expansion.  
129 Further, the NKT cells decreased significantly in the *infected*, *Cy-infected*, and *Cy-uninfected*  
130 groups as compared to the *uninfected* control at 7 and 14 dpi (Fig. 2). However, these cells  
131 increased in the *infected* and *Cy-infected* groups in the later stages of infection (Supplementary 1).  
132 A significant reduction in B-1 cells was reported in the *infected*, *Cy-infected*, and *Cy-uninfected*  
133 groups as compared to the *uninfected* control at 14, 21, and 28 dpi (Fig. 2). Moreover, B-2 cells  
134 decreased in the *infected* and *Cy-infected* groups as compared to the *uninfected* control at 14 dpi but  
135 increased significantly in the *infected* group at 28 dpi (Fig. 2). Another notable observation was a  
136 decrease in the dendritic cells in PP in the *infected* and *Cy-infected* groups (Fig. 3a). PP in the  
137 *infected* group was more evident, with a marked increase in the germinal center activity, thereby  
138 expanding the lymphoid center (Fig. 3b). Moreover, PP from *Cy-infected* mice showed a rarified  
139 lymphoid tissue (Fig. 3b), enlarged lymphatics, and clusters of *E. intestinalis* spores (data not  
140 shown).  
141 Interestingly, Cy treatment (*Cy-uninfected*) showed an immunomodulatory effect on lymphocyte  
142 populations in the intestinal mucosa. Overall, elevated levels of CD8<sup>+</sup> T, CD4<sup>+</sup> T, and B-2 cell  
143 populations were observed as compared to other groups (Fig. 2).

144  
145 **T and B lymphocytes decreased in mesenteric lymph nodes of *Cy-infected* mice.** The  
146 populations of B-2, CD4<sup>+</sup> T, CD8<sup>+</sup> T, and NKT cells decreased at 21 and 28 dpi in the *Cy-infected*  
147 group as compared to the *infected* group, suggesting the immunosuppressive effect of Cy. At 14 dpi,  
148 a higher percentage of macrophages was present in the *Cy-infected* group as compared to the  
149 *infected* group; however, this witnessed a decrease at 21 and 28 dpi (Fig. 4).

150  
151 **T and B lymphocytes decreased in the peritoneum of *E. intestinalis*-infected mice.** The CD4<sup>+</sup> T,  
152 CD8<sup>+</sup> T, and NKT cells decreased significantly in all *infected* groups as compared to the *uninfected*

153 control (Fig. 5). Moreover, CD8<sup>+</sup> T, B-1, and B-2 lymphocytes decreased significantly in all Cy-  
154 treated groups at 7 and 28 dpi (Fig. 5). At 14 dpi, both B-1 and B-2 cell populations and  
155 macrophages increased in the *infected* group as compared to the *Cy-infected* group (Fig. 5).  
156 However, the macrophage number decreased in the *infected*, *Cy-infected*, and *Cy-uninfected* groups  
157 at 14 and 28 dpi (Fig. 5). Overall, the infected mice showed a decreased number of B-1, B-2, CD4<sup>+</sup>  
158 T, and CD8<sup>+</sup> T cells, with a statistical difference at 14 dpi (Supplementary Fig. 2). This difference  
159 was maintained at 21 and 28 dpi for B cells, but not for T cells.

160

161 **Pro- and anti-inflammatory cytokines detected in the ileum of infected mice.** *E. intestinalis*  
162 infection was associated with increased levels of various pro- and inflammatory cytokines,  
163 including IL-10, IL-17a, TNF- $\alpha$ , IFN- $\gamma$ , IL-6, IL-4, and IL-2 at 14 dpi (Fig. 6). High levels of TNF-  
164  $\alpha$  persisted at 21 and 28 dpi, whereas other cytokines were not detected at these dpi (Fig. 6).  
165 These results implied that Cy treatment increased the production of IL-10 and IFN- $\gamma$  at 7 dpi in the  
166 *Cy-uninfected* group as compared to the *uninfected* group. The highest level of cytokines was  
167 observed in the *Cy-infected* mice and included mostly IL-2, IL-6 and IL-4. The cytokine IL-17a was  
168 detected in all groups in all experimental animals although no statistical difference was observed  
169 between them. Moreover, the *uninfected* group showed enhanced levels of TNF- $\alpha$  (Fig. 6).  
170 Overall, the cytokines levels in the present study after *E. intestinalis* infection corroborate with the  
171 histopathological results obtained in all *infected* groups at 7 and 14 dpi, reflecting the immune  
172 system-mediated attempt to counter the intestinal infection.

173

174 **Transmission electron microscopy.** Transmission electron microscopy (TEM) results showed *E.*  
175 *intestinalis* spores of varying shapes, from oval to piriform, to be present close to the  
176 microvillousities and in the cytoplasm of enterocytes (Fig. 7) of the *Cy-infected* group. Additionally,  
177 two patterns of the morphological invasion were observed: endocytosis (Fig. 7 a,b) and injection of  
178 sporoplasm by polar tubule into the host cells (Fig. 7 c,d). The discontinuous microvillousities,

179 present next to spores, showed invaginations, manifesting their attempt to engulf spores, a  
180 mechanism similar to phagocytosis. However, no phagocytic vacuoles were observed (Fig. 7 a,b,c).  
181 The cytoplasm surrounding the spores was found to be electron-dense with a high number of  
182 mitochondria (Fig. 7 a,b,c). Moreover, surrounding the *E. intestinalis* sporoplasm injection  
183 demonstrated a loss of microvillousities and cytoplasmic membrane projections involving the  
184 extruded polar tubule that appeared to form a channel for its entry into the electron-dense cytoplasm  
185 (Fig. 7 d).

186

## 187 **Discussion**

188 *E. intestinalis* invades and develops in the cytoplasm of enterocytes, causing persistent diarrhea in  
189 humans with AIDS (7) or in individuals immunocompromised by cancer or chemotherapy (23,24).  
190 Microsporidia also infect the macrophages of the lamina propria that help in its dissemination to  
191 kidneys and the hepatobiliary tract (25). In the present study, we observed oral infection with *E.*  
192 *intestinalis* not to be associated with clinical signs, such as diarrhea, even in the Cy-  
193 immunosuppressed mice. However, microscopically, lymphoplasmacytic enteritis was observed in  
194 association with *E. intestinalis* spores.

195 The adaptive immune response is very crucial for containing microsporidiosis. For example, T  
196 cells-deficient mice (athymic/nude or SCID) are incapable of successfully killing the pathogen and  
197 die due to encephalitozoonosis as opposed to immunocompetent mice (1,26). Similarly, IFN- $\gamma$ <sup>-/-</sup>  
198 mice lacking major proinflammatory cytokines showed hepatomegaly, colicystitis, splenomegaly,  
199 intestinal enlargement, and ascites three to four weeks post infection with *E. intestinalis*. Moreover,  
200 these mice could live only up to six weeks post infection (25). Therefore, physical or genetic  
201 deletion of immune cells or cytokines represents a situation that does not correspond to clinical  
202 observations observed in individuals immunosuppressed by drugs. Since immunosuppressive drugs  
203 act on different cells of the immune system, leading to a diversity of immunocompromised states,  
204 we used Cy to mimic the physiological immunosuppression situations.



205 We observed that *Cy-infected* mice showed a higher number of spores, reflecting the increased  
206 susceptibility to pathogen upon treatment with Cy, as previously reported by our group in  
207 experimental *E. cuniculi* infection in mice (22). Unexpectedly, the present results showed a  
208 decrease in fungal burden and histopathological lesions in immunosuppressed mice at 21 and 28  
209 dpi, indicating successful elimination of pathogen. Cy treatment is lymphotoxic and rapidly  
210 decreases the T and B cell populations (14). However, a study reported it to cause an extensive  
211 mobilization of immune cells from the bone marrow and other lymphoid organs (18). In the present  
212 study, we observed an increase in CD4<sup>+</sup> T and CD8<sup>+</sup> T cells population in the IM of Cy-treated  
213 mice. These results may be associated to two possible explanations: i) the displacement of immune  
214 cells from nearby immune sites such as Peyer's patches, lymph nodes and peritoneum favored the  
215 assembly of an immune response in the gut capable of controlling infection, however, in this case, it  
216 should be considered that such reduction could be linked to the suppressive effect of Cy on these  
217 immune sites, or ii) low action on the immune population of the intestinal mucosa, especially T  
218 cells, data that may be linked to a possible immunomodulatory activity of Cy, which should be  
219 further explored

220 Another observation that point toward resolution of infection is the increased presence of mitosis in  
221 the intestinal crypts of the small intestine associated with enteritis in all infected animals, indicating  
222 tissue remodeling in the intestine under both pathological and physiological conditions (27). Since  
223 enterocytes serve as the first physical barrier against pathogens in intestine, maintenance of a strong  
224 epithelial barrier is crucial for normal physiology and evasion of infections. Moreover, epithelial  
225 cells secrete important chemoattractants that are involved in cell chemotaxis (28). The IELs  
226 constitute a sub-population of T lymphocytes in the IM that has been implicated in both intestinal  
227 homeostasis and inflammation, as observed in intestinal toxoplasmosis. Another important category  
228 of immune cells is dendritic cells that reside in the lamina propria beneath the IM and act as antigen  
229 presenting cells. They play a crucial role in containing toxoplasmosis. Lamina propria also

230 comprises CD4<sup>+</sup> T, CD8<sup>+</sup> T, and B lymphocytes; B cells are known for producing secretory IgA  
231 that is responsible for the exclusion of environmental antigens (29).

232 There are reports stating an effective immune response against microsporidia to involve majorly  
233 CD8<sup>+</sup> T cells (30,31). Interestingly, other studies report CD8<sup>+</sup> T cells and not CD4<sup>+</sup> T cells to be  
234 indispensable in successfully eliminating pathogens in intraperitoneal infection by *E. cuniculi*  
235 (30,32). In fact, the dichotomic role of CD4<sup>+</sup> T cells has been shown to be associated with the  
236 infection route. It has been shown that the oral infection with *E. cuniculi* stimulates a synergistic  
237 effect of CD8<sup>+</sup> and CD4<sup>+</sup> T cells (12). The present study also reported an increased number of CD4<sup>+</sup>  
238 T cells in the intestines of infected mice, contributing to successful *E. intestinalis* elimination. We  
239 believe this increase in CD4<sup>+</sup> T cells to be attributed to the immunomodulatory effect of Cy in the  
240 intestinal mucosa.

241 Evidence from literature reports CD4<sup>+</sup> and CD8<sup>+</sup> T cells, associated with IFN- $\gamma$  and IL-12  
242 cytokines, to be important players in eliminating *E. intestinalis* infection (8,9). The present results  
243 reinforce this hypothesis; as evident by a significant increase in CD8<sup>+</sup> T cells in all infected groups.  
244 A subsequent decrease in CD8<sup>+</sup> T cell population was associated with a decrease in spore numbers  
245 and histopathological lesions. At 7 and 14 dpi, the increased production of TNF- $\alpha$ , IFN- $\gamma$ , and IL-10  
246 cytokines was noticed in the ileum of infected mice, together with an increase in IL-2 and IL-4 in  
247 *Cy-infected* mice. The results suggest that besides IFN- $\gamma$  (8,9), other cytokines, including anti-  
248 inflammatory cytokines, play a crucial role in mediating an intestinal immune response against *E.*  
249 *intestinalis*, for the resolution of enteritis and pathogen killing.

250 The IELs comprise a heterogeneous population, predominantly composed of CD8<sup>+</sup> T (CD8 $\alpha\alpha$  and  
251 CD8 $\alpha\beta$ ) cells and a few CD4<sup>+</sup> T lymphocytes and known to play an important role in oral  
252 infections. Upon infection, an expansion in the number of these cells causes increased production of  
253 IFN- $\gamma$ , cytolytic properties of which inhibit intestinal *E. cuniculi* proliferation and dissemination  
254 (12). In fact, our results showed an increased CD8<sup>+</sup> T IELs in intestinal *E. intestinalis* infection.  
255 However, CD8<sup>+</sup> T cells decreased in the peritoneal cavity, suggesting their migration to the site of

256 pathogen proliferation. This finding is in corroboration to previous studies that have already shown  
257 cells in the peritoneal cavity to migrate to other sites (33,34).

258 Our group has previously shown B-1 cells to be an important player in the generation of the  
259 immune response against *E. cuniculi* infection (35,36). B-1 cells are important in generating  
260 adaptive immune response and antibody production, which is independent of T cells (37). However,  
261 B-1 cells are also dependent on T cells for generating an effective immune response, such as cell-  
262 mediated hypersensitivity (38,39) and rejection of allografts (40). Moreover, adoptive transfer of  
263 B-1 cells activates T cells that produce IFN- $\gamma$  (41). Here, we showed a decrease in B-1 cell  
264 frequency in *infected* animals as compared to controls of both intestine and peritoneal cavity. We  
265 hypothesized that B-1 cells from the peritoneal cavity differentiated into B-1 cell-derived phagocyte  
266 (B-1 CDP) in infected mice, which, in turn, promoted phagocytosis of *E. intestinalis* spores. *In vitro*  
267 studies showed that B-1 cells may also differentiate into mononuclear phagocytes, which upon  
268 attachment to a substrate, acquire a myeloid phenotype (33). Moreover, *Propionibacterium acnes*  
269 infection of B-1 cells of myeloid lineage induced only differentiation into phagocytes (42);  
270 however, the role of B-1 cells in the intestines warrants further understanding of microsporidia  
271 infection.

272 We also found a decrease in the NKT cells in the intestine and mesenteric lymph nodes in all  
273 infected mice. NKT cells are known to play a protective role in *Toxoplasma gondii* oral infection  
274 although these cells are susceptible to direct invasion by the parasite (43). In fact, NKT cells  
275 develop a hypermotility phenotype *in vivo* during *T. gondii* oral infection, suggesting manipulation  
276 of motility of immune cells by *T. gondii*, which assist in the spread of the causative organism  
277 (44,45), as already shown in macrophages (45). *E. cuniculi* uses macrophages as a Trojan horse  
278 (46); however, whether this phenomenon occurs with NKT cells in microsporidiosis remains largely  
279 unknown.

280 While an effective immune response against microsporidia is predominantly driven by T cells,  
281 dendritic cells have also been shown to play an important and critical role in stimulating these cells.

282 Dendritic cells of the IM act as antigen-presenting cells and are responsible for priming T naive  
283 cells in effectors and memory cells upon infection (47). The secretion of cytokines and chemokines  
284 from infected enterocytes results in migration of these cells from PP to the mucosa (28). On the  
285 other hand, a study reported *in vitro* inhibition of dendritic cell differentiation by *E. intestinalis*  
286 (48). On the same lines, we, in the present study, demonstrate a reduction in dendritic cells in PP of  
287 infected animals at 7 and 14 dpi, which was associated with a higher number of fungal spores and  
288 histopathological lesions, suggesting the migration of these cells to the site of infection.

289 In the gastrointestinal tract, dendritic cells play an important role in suppression of colitis  
290 development, inducing the traffic of T regulatory cells in the intestine, and inducing IgA secretion  
291 from B cells in the intestine (28). These are also involved in inducing oral tolerance and preventing  
292 inflammatory response mediated by gut microbiota and ingested antigens (28). The breach in this  
293 function may decrease the number of T regulatory cells and increase the number of cells producing  
294 *Th1* and *Th17* cytokines (28). A lower frequency of dendritic cells observed in the present study is  
295 related to a higher parasite burden; however, this is yet to be clarified.

296 It has been previously shown that microsporidia spores infect new cells mostly by injection of  
297 sporoplasm into the host cells via the polar tubule (49). However, different cell lineages are capable  
298 of phagocytosing microsporidia spores (50,51), suggesting endocytosis to be an important  
299 mechanism in intestinal microsporidiosis. In order to evade this protective mechanism,  
300 microorganisms have developed complex systems to subvert endocytosis by host cells, allowing  
301 invasion of even those cells that generally do not phagocytose (52). Previous studies have suggested  
302 microsporidia to induce invaginations of the cell membrane of host cells close to the polar tubule in  
303 a process similar to endocytosis, causing injection of sporoplasm into the host cell. The results of  
304 TEM showed that a phenomenon similar to phagocytosis occur more frequently in *E. intestinalis*  
305 infection.

306 The results of this study showed that the increase in the CD8<sup>+</sup> and CD4<sup>+</sup> T cell population in the  
307 intestinal mucosa of Cy immunosuppressed mice and orally infected with *E. intestinalis*, in

308 association with the presence of pro-inflammatory cytokines, controlled the infection by the  
309 opportunistic fungus, although reduction of cellular populations at immune sites has been observed,  
310 confirming a state of immunosuppression, reinforcing that the selective effect of Cy should be  
311 better understood.

312

## 313 **Methods**

### 314 **Animals**

315 Specific pathogen-free, 6–8-week-old C57BL/6 mice were purchased from the Federal University  
316 of São Paulo (CEDEME, UNIFESP), Brazil. Animals were housed under sterile conditions at the  
317 Animal Facility of Paulista University, São Paulo, Brazil, and given food and water *ad libitum*. All  
318 animal procedures were performed in strict accordance with the Paulista University Ethics  
319 Committee (project license no. 313/15).

320

### 321 ***Encephalitozoon intestinalis* cultivation and experimental infection**

322 Spores of *E. intestinalis* were purchased from Waterborne Inc., New Orleans, LA, United States.  
323 These were cultivated in rabbit kidney cells (RK–13) in Dulbecco's Modified Eagle's medium  
324 (DMEM) supplemented with 10% fetal bovine serum (FBS), pyruvate, non-essential amino acids,  
325 and gentamicin followed by incubation at 37 °C and 5% CO<sub>2</sub>. Spores were collected from the  
326 supernatant, washed thrice in phosphate-buffered saline (PBS), and counted using a Neubauer  
327 chamber.

328

### 329 **Study design**

330 Mice were divided into four experimental groups: *infected*, mice infected with *E. intestinalis*;  
331 *uninfected*, non-infected and non-treated mice; *Cy-infected*, mice treated with cyclophosphamide  
332 and infected with *E. intestinalis*; and *Cy-uninfected*, mice treated with cyclophosphamide. The Cy-  
333 treatment protocol was previously established (22) and consisted of intraperitoneal injection of 100

334 mg/kg twice a week (Genuxal; Asta Medica Oncologia, São Paulo, Brazil). The treatment started at  
335 the day of infection until 28 days post infection (dpi). Mice were orally infected by gavage with  $5 \times$   
336  $10^7$  *E. intestinalis* spores. Non-infected mice served as control.

337

### 338 **Necropsy and tissue sampling**

339 At 7, 14, 21, and 28 dpi, five animals from each group were euthanized with a mixture of ketamine  
340 (100 mg/mL), xylazine (20 mg/mL), and fentanyl (0.05 mg/mL). The samples of the intestine  
341 (duodenum, ileum), liver, kidneys, and lungs were collected and fixed in 10% buffered formalin for  
342 72 h, routinely processed for histopathology, and stained with hematoxylin-eosin (HE) and Giemsa.

343

### 344 **Ultrastructural analysis by transmission electronic microscopy**

345 Ileum samples of 1 mm thickness from Cy-infected mice were fixed in 2% glutaraldehyde in 0.2 M  
346 cacodylate buffer (pH 7.2) at 4 °C for 10 h. These were then fixed in buffered 1% OsO<sub>4</sub> for 3 h.  
347 Subsequently, the samples were embedded in EPON resin, sliced into semi-thin cuts, and stained  
348 with toluidine blue. Then, ultrathin sections were double stained using uranyl and lead citrate and  
349 observed under the TEM LEO EM 906 at 80 kV at the Butantan Institute.

350

### 351 **Fungal burden**

352 The paraffinized ileum was cut into 5- $\mu$ m thick sections and evaluated histopathologically using HE  
353 staining to determine the fungal number. Fungal spores were counted randomly in at least 10 fields  
354 under the light microscope (40 $\times$  objective magnification). The average number of spores from each  
355 mice was recorded and statistically analyzed.

356

### 357 **Phenotypic analysis of immune intestinal mucosal cells**

358 Cells of the IM were obtained as previously described,<sup>53</sup> with minor modifications. The small  
359 intestine was washed with 50 mL of Hanks' balanced salt solution (HBSS)–2% FBS solution,

360 longitudinally cut and separated into 2-cm segments. The mucosa was grated and submerged in  
361 HBSS–2% FBS solution supplemented with 0.1 M ethylenediaminetetraacetic acid (EDTA) at 37°C  
362 for 20 min. Then, samples were vortexed for 15 s and filtered using a cell strainer to remove the cell  
363 debris. Percoll gradient (70% and 40%) centrifugation was used to isolate the IM cells. After  
364 centrifugation, cells were washed with HBSS–2% FBS and resuspended in 100 µL of PBS–1%  
365 bovine serum albumin (BSA).  
366 Mesenteric lymph nodes (MLN) and Peyer’s patches (PP) were isolated from the intestines using a  
367 scalped blade and washed in a cell strainer with HBSS–2% FBS. In addition, cells from the  
368 peritoneal cavity (PerC) were obtained by successive washes with at least 10 mL of HBSS–2%  
369 FBS. Finally, cell suspensions from PerC, MLN, and IM were washed with HBSS–2% FBS and  
370 resuspended in 100 µL of PBS–1% BSA. After centrifugation at 500 ×g for 5 min, each sample was  
371 incubated at 4 °C for 20 min with the anti-CD16/CD32 antibody. After incubation, cells were  
372 divided into two aliquots and resuspended in PBS–1% BSA, followed by incubation with  
373 monoclonal antibodies: APC-conjugated anti-mouse CD19, FITC, or PE-conjugated anti-mouse  
374 CD23, PerCP-conjugated anti-mouse CD4, FITC-conjugated anti-mouse CD8, APC-Cy7-  
375 conjugated anti-mouse CD11b, and PE-conjugated anti-mice CD11c (BD Pharmingen; San Diego,  
376 CA, United States). Finally, cell suspensions were run on the flow cytometer FACS Canto II (BD  
377 Biosciences; Mountain View, CA, United States). The cells were characterized according to their  
378 phenotypes in CD8 T (CD19<sup>-</sup> CD4<sup>-</sup> CD8<sup>+</sup>), CD4 T (CD19<sup>-</sup> CD8<sup>-</sup> CD4<sup>+</sup>), NKT cells (CD19<sup>-</sup> CD4<sup>+</sup>  
379 NK1.1<sup>+</sup>), B-1 (CD23<sup>-</sup> CD19<sup>+</sup>), B-2 cells (CD23<sup>+</sup> CD19<sup>+</sup>) and dendritic cells (CD11c<sup>+</sup>); and analyzed  
380 with the software FlowJo (FlowJo LLC; data analysis software, Ashland, OR, United States).

381

### 382 **Cytokine quantification**

383 For quantification of intestinal cytokines, 100 mg of ileum was sampled and treated with 1 mL of  
384 protease inhibitor (Sigma-Aldrich; St. Louis, MO, United States) at –80 °C. The sample was  
385 thawed and processed using a Precellys homogenizer for three cycles, 20 s each, filtering the

386 homogenate using a cell strainer to remove the debris. Cytokines (IL-2, IL-4, IL-6, IL-10, IL-17,  
387 IFN- $\gamma$ , and TNF- $\alpha$ ) in the homogenate were measured using the CBA Mouse Th1/Th2/Th17  
388 cytokine kit (BD Biosciences; CA, United States) according to manufacturer's instructions. The kit  
389 consists of fluorescent beads coated with antibodies specific to cytokines. Briefly, 25  $\mu$ L of each  
390 sample was added to capture beads and PE-labeled secondary antibodies. The samples were  
391 incubated for 2 h at room temperature in the dark, following which two-color flow cytometry  
392 analysis was performed on the FACS Canto II flow cytometer (BD Biosciences; Mountain View,  
393 CA, United States) and analyzed using the FCAP Array 1.0 software (BD Biosciences; CA, United  
394 States).

395

#### 396 **Statistical analysis**

397 Analysis of variance (ANOVA) tests and Tukey's or Bonferroni's multiple comparison post-tests  
398 were used for the statistical analysis of data. All values are expressed as mean  $\pm$  standard error mean  
399 (SEM) with significance of  $\alpha = 0.05$  ( $p < 0.05$ ). All graphs were generated using the "GraphPad  
400 Prism" version 5.0 for Windows (GraphPad Software Inc; La Jolla, CA, United States).

401

#### 402 **Acknowledgments**

403 We thank Magna Maltauro Soares (Instituto Butantan) for histopathological processing. We thank  
404 Fundação de Amparo à Ciência do Estado de São Paulo–Fapesp and Capes for financial support.

405

#### 406 **Competing interests**

407 The authors declare no competing interests

408

#### 409 **References**

410 1. Moretto M, Khan IA, Weiss LM. 2012. Gastrointestinal cell mediated immunity and the  
411 microsporídia. Plos Pathogen 8: e.100 2765.



- 412 2. Didier ES, Weiss LM. 2011. Microsporidiosis: not just in AIDS patients. *Curr Opin Infect Dis*  
413 24:490–495.
- 414 3. Kicia M, Wesolowawska M, Jakuszko K, Kopacz Z, Sak B, Květonova D, Krajewska M, Kváč  
415 M. 2014. Concurrent infection of the urinary tract with *Encephalitozoon cuniculi* and  
416 *Enterocytozoon bieneusi* in a renal transplant recipient. *J Clin Microbiol* 52:1780–1782.
- 417 4. Hinney B, Sak B, Joachim A, Kváč M. 2016. More than a rabbit's tale e *Encephalitozoon* spp. in  
418 wild mammals and birds. *Int J Parasitol* 5:76–87.
- 419 5. Field AS, Milner DA. 2015. Intestinal microsporidiosis. *Clin Lab Med* 35:445–459.
- 420 6. Han B, Weiss LM. 2017. Microsporidia: Obligate Intracellular Pathogens within the Fungal  
421 Kingdom. *Microbiol Spectr* 5. doi:10.1128/microbiolspec. FUNK-0018-2016.
- 422 7. Didier ES. 2005. Microsporidiosis: an emerging and opportunistic infection in human and  
423 animals. *Acta Trop*. 94:61–76.
- 424 8. Salát J, Sak B, Le T, Kopecký J. 2004. Susceptibility of IFN- gamma or IL-12 knock-out and  
425 SCID mice to infection with two microsporidian species, *Encephalitozoon cuniculi* and *E.*  
426 *intestinalis*. *Folia Parasitol* 51:275–282.
- 427 9. Salát J, Horká H, Sak B, Kopecký J. 2006. Pure CD4<sup>+</sup> T-lymphocytes fail to protect perorally  
428 infected SCID mice from lethal microsporidiosis caused by *Encephalitozoon cuniculi*. *Parasitol Res*  
429 99:682–686.
- 430 10. Allaire JM, Crowley SM, Law HT, Chang S, Ko H, Vallance BA. 2018. The intestinal  
431 epithelium: central coordinator of mucosal immunity. *Trends Immunol*. 39:677-696.  
432 <https://doi.org/10.1016/j.it.2018.04.002>.
- 433 11. Mangan NE, Fung, KY. 2012. Type I interferons in regulation of mucosal immunity. *Immunol*  
434 *Cell Biol* 90:510–519.
- 435 12. Moretto M, Weiss LM, Khan IA. 2004. Induction of a rapid and strong antigen-specific  
436 intraepithelial lymphocyte response during oral *Encephalitozoon cuniculi* infection. *J Immunol*  
437 172:4402–4409.

- 438 13. World Health Organization. 2013. WHO Model list of Essential Medicine.  
439 [http://www.who.int/medicines/publications/essentialmedicines/18th\\_EML.pdf](http://www.who.int/medicines/publications/essentialmedicines/18th_EML.pdf).
- 440 14. Brodsky RA. 2010. High-dose cyclophosphamide for autoimmunity and alloimmunity.  
441 *Immunol Res* 47:79–84.
- 442 15. Dezern AE, Styler MJ, Drachman DB, Hummers LK, Jones RJ, Brodsky RA. 2013. Repeated  
443 treatment with high dose cyclophosphamide for severe autoimmune diseases. *Am J Blood Res*  
444 3:84–90.
- 445 16. Colvin OM. 1999. An overview of cyclophosphamide development and clinical applications.  
446 *Curr Pharm Des* 5:555–560.
- 447 17. Emadi AL, Jones RJ, Brodsky RA. 2009. Cyclophosphamide and cancer: golden anniversary.  
448 *Nat Rev Clin Oncol* 6:638–647.
- 449 18. Sistigu A, Viaud S, Chaput N, Bracci L, Proietti E, Zitvogel L. 2011. Immunomodulatory  
450 effects of cyclophosphamide and implementations for vaccine design. *Semin Immunopathol*  
451 33:369–383.
- 452 19. Sevko A, Sade-Feldman M, Kanterman J, Michels T, Falk CS, Umnsky L, Ramacher M, Kato  
453 M, Schadendorf D, Baniyash M, Umansky V. 2013. Cyclophosphamide promotes chronic  
454 inflammation-dependent immunosuppression and prevents antitumor response in melanoma. *J*  
455 *Invest Dermatol* 133:1610–1619.
- 456 20. Schiavoni G, Sistigu A, Valentini M, Mattei F, XSestili P, Spadaro F, Sanchez M, Lorenzi S,  
457 D’Urso MT, Belardelli F, Gabriele L, Proietti E, Braccio L. 2011. Cyclophosphamide synergizes  
458 with type I interferons through systemic dendritic cell reactivation and induction of immunogenic  
459 tumor apoptosis. *Cancer Res* 71:768–778.
- 460 21. Viaud S, Flament C, Zoubir M, Pautier P, LeCesne A, Ribrag V, Soria JC, Marty V, Vielh P,  
461 Robert C, Chaput N, Zitvogel L. 2011. Cyclophosphamide induces differentiation of Th17 cells in  
462 cancer patients. *Cancer Res.* 71:661–665.

- 463 22. Lallo MA, Hirschfeld MMP. 2012. Encephalitozoonosis in pharmacologically  
464 immunosuppressed mice. *Exp Parasitol* 131:339–343.
- 465 23. Chabchoub N, Abdelmalek R, Mellouli F, Kanoun F, Thellier M, Bouratbine A, Aoun K. 2009.  
466 Genetic identification of intestinal microsporidia species in immunocompromised patients in  
467 Tunisia. *Am J Trop Med Hyg* 80:24–27.
- 468 24. Hamamci B, Çetinkaya Ü, Berk V, Kaynar L. 2015. Prevalence of *Encephalitozoon intestinalis*  
469 and *Enterocytozoon bieneusi* in cancer patients under chemotherapy.  
470 *Mikrobiyol Bul* 49:105–113.
- 471 25. El Fakhry Y, Achbarou A, Franetich JF, Desportes-Livage I, Mazier D. 2001. Dissemination of  
472 *Encephalitozoon intestinalis*, a causative agent of human microsporidiosis, in IFN-gamma receptor  
473 knockout mice. *Parasite Immunol* 23:19–25.
- 474 26. Gannon J. 1980. The course of infection of *Encephalitozoon cuniculi* in immunodeficient and  
475 immunocompetent mice. *Lab Anim* 14:189–192.
- 476 27. Fuss IJ, Heller F, Boirivant M, Leon F, Yoshida M, Fichtner-Feigi S, Yang Z, Exley M, Kitani  
477 A, Blumberg RS, Mannon P, Sttober W. 2004. Nonclassical CD1d-restricted NK T cells that  
478 produce IL-13 characterize an atypical Th2 response in ulcerative colitis. *J Clin Invest* 15:1490–  
479 1497.
- 480 28. Goodman WA, Pizarro TT. 2013. Regulatory cell populations in the intestinal mucosa. *Curr*  
481 *Opin Gastroenterol* 29:614–620.
- 482 29. Cohen SB, Denkers EY. 2015. The gut mucosal immune response to *Toxoplasma gondii*.  
483 *Parasite Immunol* 37:108–117.
- 484 30. Braunfuchsová P, Salát J, Kopecký J. 2001. CD8<sup>+</sup> T-lymphocytes protect SCID mice against  
485 *Encephalitozoon cuniculi* infection. *Int J Parasitol* 15:681–686.
- 486 31. Khan IA, Schwartzmn JD, Kasper LH, Moretto M. 1999. CD8<sup>+</sup>CTLs are essential for  
487 protective against *Encephalitozoon cuniculi* infection. *J Immunol* 162:6086–6091.

- 488 32. Moretto M, Casciotti L, Durell B, Khan IA. 2000. Lack of CD4<sup>+</sup> T cells does not affect  
489 induction of CD8<sup>+</sup> T-cell immunity against *Encephalitozoon cuniculi* infection. *Infect Immun*  
490 68:6223–6232.
- 491 33. Almeida SR, Aroeira LS, Frymuller E, Dias MA, Bogsan CS, Lopes JD, Mariano M. 2001.  
492 Mouse B-1 cell-derived mononuclear phagocyte, a novel cellular component of acute non-specific  
493 inflammatory exudate. *Int Immunol* 13:1193–201.
- 494 34. Palos MC, Azevedo MC, Thies FG, Osugui L, Alveres AM, Laurindo MF, Russo RT, Popi AF,  
495 Mariano M. 2012. Different inflammatory stimuli in the footpad of mice influence the kinetics of  
496 resident peritoneal cells. *Inflamm Res* 61:1187–1194.
- 497 35. Da Costa LF, Alvares-Saraiva AM, Dell'Armeline Rocha PR, Spadacci-Morena DD, Perez EC,  
498 Mariano M, Lallo MA. 2017. B-1 cell decreases susceptibility to encephalitozoonosis in mice.  
499 *Immunobiol* 222:218–227.
- 500 36. Langanke dos Santos D, Alvares-Saraiva AM, Xavier, JG, Spadacci-Morena DD, Peres GB,  
501 Dell' Armeline Rocha PR, Perez EC, Lallo MA. 2018. B-1 cells upregulate CD8 T lymphocytes and  
502 increase proinflammatory cytokines serum levels in oral encephalitozoonosis. *Microbes Infect*  
503 20:196–204.
- 504 37. Choi YS., Baumgarth N. 2008. Dual role for B-1a cells in immunity to influenza virus infection.  
505 *J Exp Med* 205:3053–3064.
- 506 38. De Lorenzo B, Brito RR, Godoy LC, Lopes JD, Mariano M. 2007. Tolerogenic property of B-  
507 1b cells in a model of allergic reaction. *Immunol Lett* 114:110–118.
- 508 39. Szczepanik M, Akahira-Azuma M, Bryniarski K, Tsuji RF, Kawikova I, Ptak W, Kiener C,  
509 Campos RA, Askenase PW. 2003. B-1 B cells mediate required early T cell recruitment to elicit  
510 protein-induced delayed-type hypersensitivity. *J Immunol* 171:6625–6635.
- 511 40. Nogueira-Martins MF, Mariano M. 2010. B-1 cell participation in T-cell-mediated alloimmune  
512 response. *Immunobiol* 215,:264–274.

- 513 41. Margry B, Wieland WH, van Kooten PJ, van Eden W, Broere F. 2013. Peritoneal cavity B-1a  
514 cells promote peripheral CD4+ T-cell activation. *Eur J Immunol* 43:2317–2326.
- 515 42. Mussalem JS, Squaiella-Baptistão CC, Teixeira D, Yendo TM, Thies FG, Popi AF, Mariano M,  
516 Longo-Mauregi I. 2012. Adjuvant effect of killed *Propionibacterium acnes* on mouse peritoneal B-  
517 1 lymphocytes and their early phagocyte differentiation. *Plos One* 7: e33955.  
518 doi:10.1371/journal.pone.0033955.
- 519 43. Persson CM, Lambert H, Vutova PP, Dellacasa-Lindberg I, Nederby J, Yagita H, Ljunggren  
520 HG, Gradien A, Barragan A, Chambers BJ. 2009. Transmission of *Toxoplasma gondii* from  
521 infected dendritic cells to natural killer cells. *Infect Immun* 77:970–976.
- 522 44. Harker KS, Ueno N, Wang T, Bonhomme C, Liu W, Lodoen MB. 2013. *Toxoplasma gondii*  
523 modulates the dynamics of human monocyte adhesion to vascular endothelium under fluidic shear  
524 stress. *J Leukoc Biol* 93:789–800.
- 525 45. Seipel D, Oliveira BC, Resende TL, Schuindt SH, Pimentel PM, Kanashiro MM, Amholdt AC.  
526 2010. *Toxoplasma gondii* infection positively modulates the macrophages migratory molecular  
527 complex by increasing matrix metalloproteinases, CD44 and alpha v beta 3 integrin. *Vet Parasitol*  
528 169:312–319.
- 529 46. Mathews A, Hotard A, Hale-Donze H. 2009. Innate immune responses to *Encephalitozoon*  
530 species infections. *Microbes Infect.* 11:905–911.
- 531 47. Steimnman RM, Hemmi H. 2006. Dendritic cells: translating innate to adaptive immunity. *Curr*  
532 *Top Microbiol Immunol* 311:17–58.
- 533 48. Bernal JA, Andrés M, Palmero MF. 2016. Bruton’s tyrosine kinase inhibitors could induce  
534 rheumatoid arthritis-like manifestations: A comment on the article by Nyhoff et al. *Arthritis*  
535 *Rheumatol* 16:475.
- 536 49. Leitch GJ, Ward TL, Shaw AP, Newman G. 2005. Apical spore phagocytosis is not a significant  
537 route of infection of differentiated enterocytes by *Encephalitozoon intestinalis*. *Infect Immun*  
538 73:7697–7704.

- 539 50. Couzinet S, Cejas E, Schittny J, Deplazes P, Weber R, Zimmerli S. 2000. Phagocytic up take of  
540 *Encephalitozoon cuniculi* by non professional phagocytes. Infect Immun 68:6939–6945.
- 541 51. Franzen C, Muller A, Hartmann P, Salzberger B. 2005. Cell invasion and intracellular fate of  
542 *Encephalitozoon cuniculi* (Microsporidia). Parasitol 130:285–292.
- 543 52. Cossart P, Sansonetti PJ. 2004. Bacterial invasion: the paradigms of entero invasive pathogens.  
544 Science 304:242–248.
- 545 53. Guy-Grand D, Griscelli C, Vassali P. 1978. The mouse gut T lymphocyte, a novel type of T  
546 cell: nature, origin, and traffic in mice in normal and graft-versus-host conditions. J Exp Med  
547 148:1661–1677.

548

#### 549 **Figure legends**

550 Figure 1. a) Photomicrograph of lymphoplasmacytic enteritis in the small intestine (arrowhead) in  
551 *Infected* mice. b) Ulceration (arrow) of intestinal mucosa of *Cy-Infected* mice. c) Clusters of *E.*  
552 *intestinalis* (arrow) at the glandular region in the mucosa of the ileum of *Cy-Infected* mice. d)  
553 Spores counting in the *Infected* and *Cy-Infected* mice. HE staining. ANOVA test with Tukey's  
554 posttest showed  $p < 0.01^{**}$  and  $p < 0.001^{***}$ .

555

556 Figure 2. Evaluation of T and B cell population in the intestinal mucosa of the mice infected with *E.*  
557 *intestinalis* and treated or not with Cy at 7, 14, 21 and 28 dpi. Percentage of lymphocytes CD8 T  
558 ( $CD19^{-} CD4^{-} CD8^{+}$ ), CD4 T ( $CD19^{-} CD8^{-} CD4^{+}$ ), NKT cells ( $CD19^{-} CD4^{+} NK1.1^{+}$ ), B-1 ( $CD23^{-}$   
559  $CD19^{+}$ ) and B-2 cells ( $CD23^{+} CD19^{+}$ ). ANOVA test with Tukey's post-test showed  $p < 0.05^{*}$ ,  $p$   
560  $< 0.01^{**}$  and  $p < 0.001^{***}$  compared to non-infected controls.

561

562 Figure 3. Peyer's patch analyzed of the mice infected with *E. intestinalis* and treated or not with Cy  
563 for 7, 14, 21 and 28 dpi. a) Percentage of dendritic cells ( $CD11c^{+}$ ) in Peyer's Patch. b)  
564 Photomicrograph of Peyer's Patch with lymphoid expansion in *Infected* group or rarified lymphoid

565 tissue in *Cy-Infected* group. HE staining. ANOVA test with Tukey's post-test showed  $p < 0.05^*$ ,  
566  $< 0.01^{**}$  and  $< 0.001^{***}$  compared to non-infected controls.

567

568 Figure 4. Cell population in the mesenteric lymph nodes of the mice infected with *E. intestinalis*  
569 and treated or not with Cy for 7, 14, 21 and 28 dpi. Percentage of B-2 cells ( $CD23^+ CD19^+$ ),  
570 macrophages ( $CD19^- CD11b^+$ ), CD4 T cells ( $CD19^- CD8^- CD4^+$ ), CD8 T cells ( $CD19^- CD4^- CD8^+$ )  
571 and NKT cells ( $CD19^- CD4^+ NK1.1^+$ ). ANOVA test with Tukey's post-test showed  $p < 0.05^*$  and  $p$   
572  $< 0.01^{**}$ .

573

574 Figure 5. T and B population in the peritoneum of the mice infected with *E. intestinalis* and treated  
575 or not with Cy for 7, 14, 21 and 28 dpi. The number of CD8 T cells ( $CD19^- CD4^- CD8^+$ ), CD4 T  
576 cells ( $CD19^- CD8^- CD4^+$ ), NKT cells ( $CD19^- CD4^+ NK1.1^+$ ), B-1 cells ( $CD23^- CD19^+$ ), B-2  
577 ( $CD23^+ CD19^+$ ) cells, and macrophages ( $CD19^- CD11b^+$ ). ANOVA test with Tukey's post-test  
578 showed  $p < 0.05^*$ ,  $p < 0.01^{**}$  and  $p < 0.001^{***}$  compared to non-infected controls.

579

580 Figure 6. Proinflammatory cytokines (IL-2, IL-6, IFN- $\gamma$ , and TNF- $\alpha$ ) and anti-inflammatory  
581 cytokines (IL-4, IL-10, and IL-17A) levels in the intestine of mice infected with *E. intestinalis* and  
582 treated or not with Cy for 7, 14, 21, and 28 dpi. ANOVA test with Tukey's posttest.

583

584 Figure 7. TEM from the intestine of *Cy-Infected* mice. a, b, and c) *E. intestinalis* spores adhered to  
585 and enterocyte (\*). Note that microvillousities disappeared, the membrane shows invaginations  
586 associated with an electron dense area in the cytoplasm close to the spore (\*). d) Injection of the  
587 sporoplasm with loss of microvillousities (arrow). Projections of cytoplasmic membrane involving  
588 the extruded polar tubule (arrow).

589

590

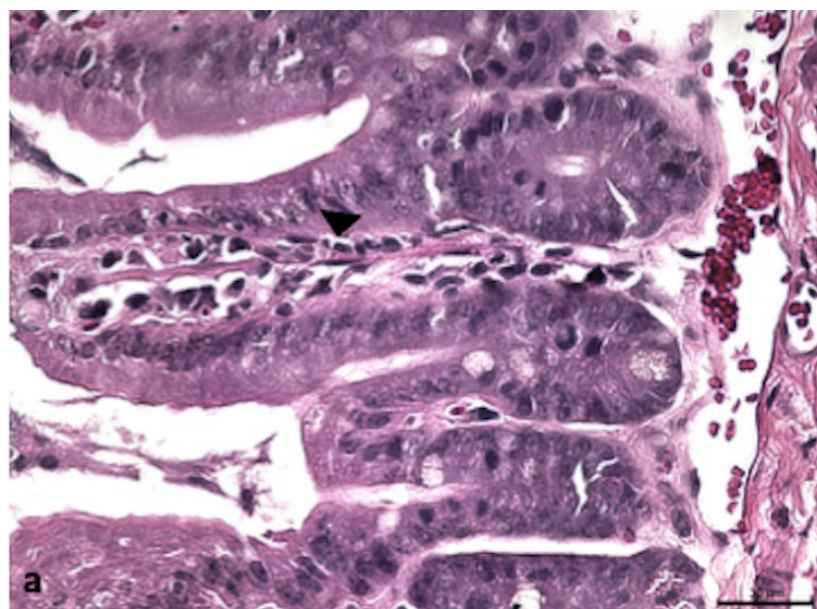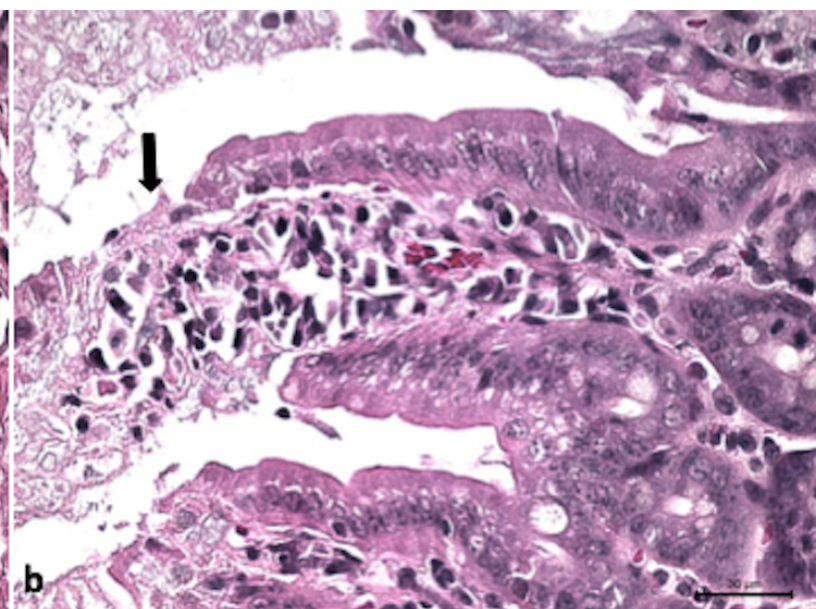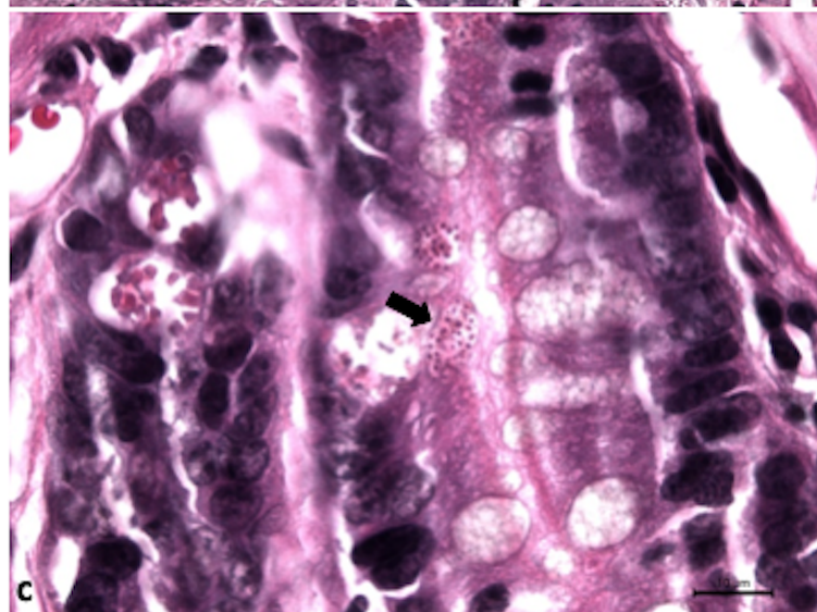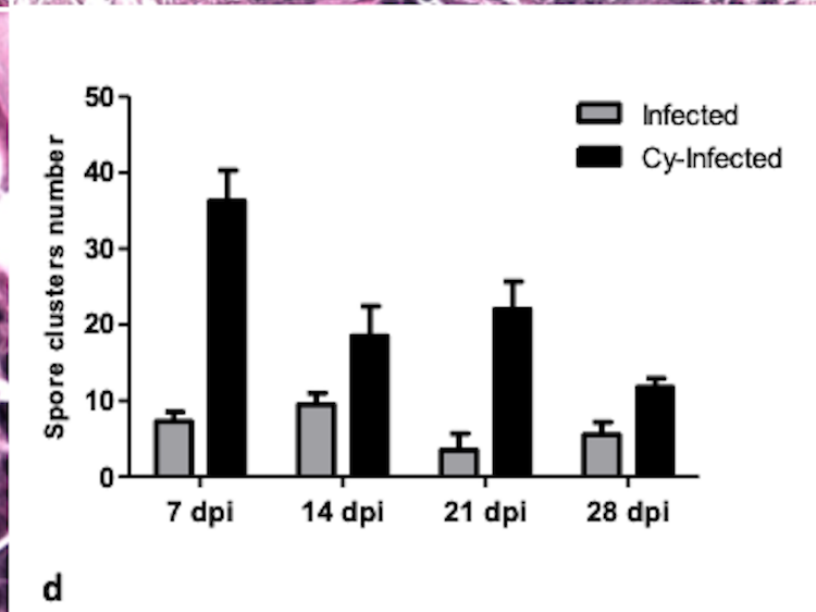



# Intestine

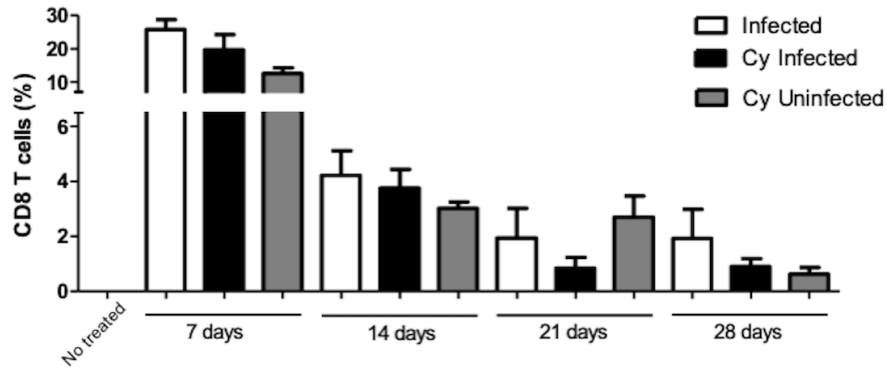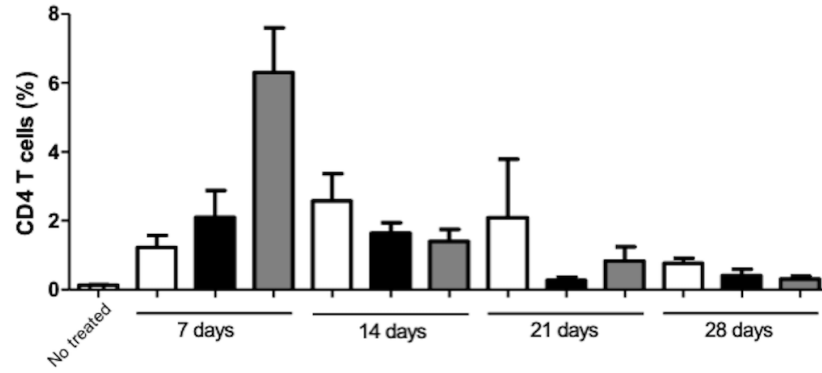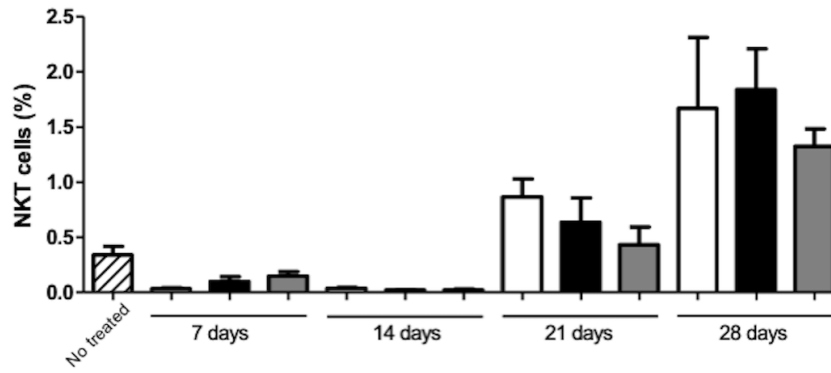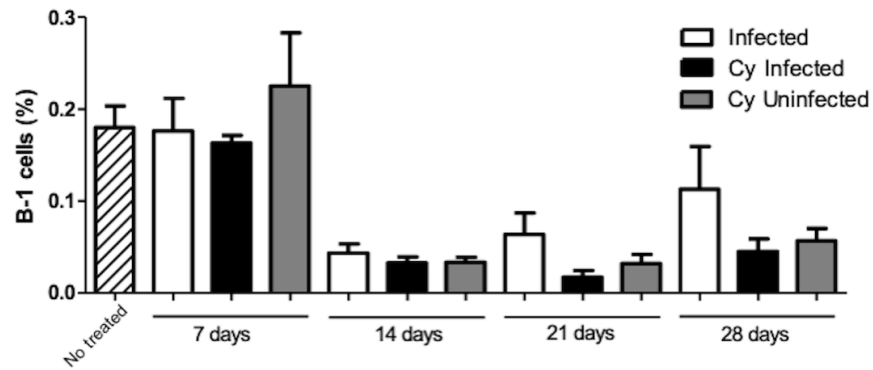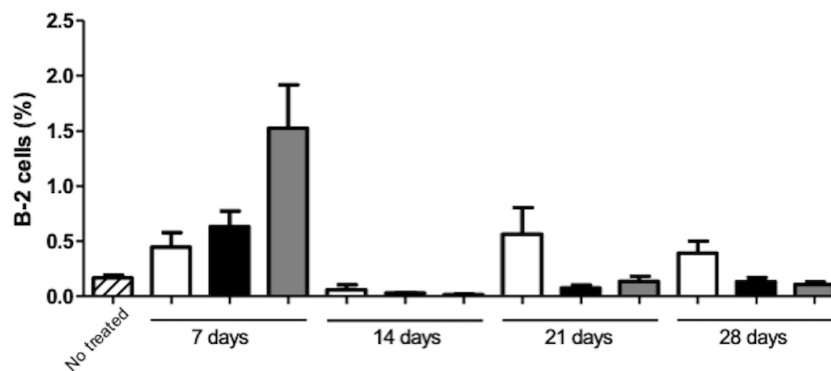

## Peyer's patch

a

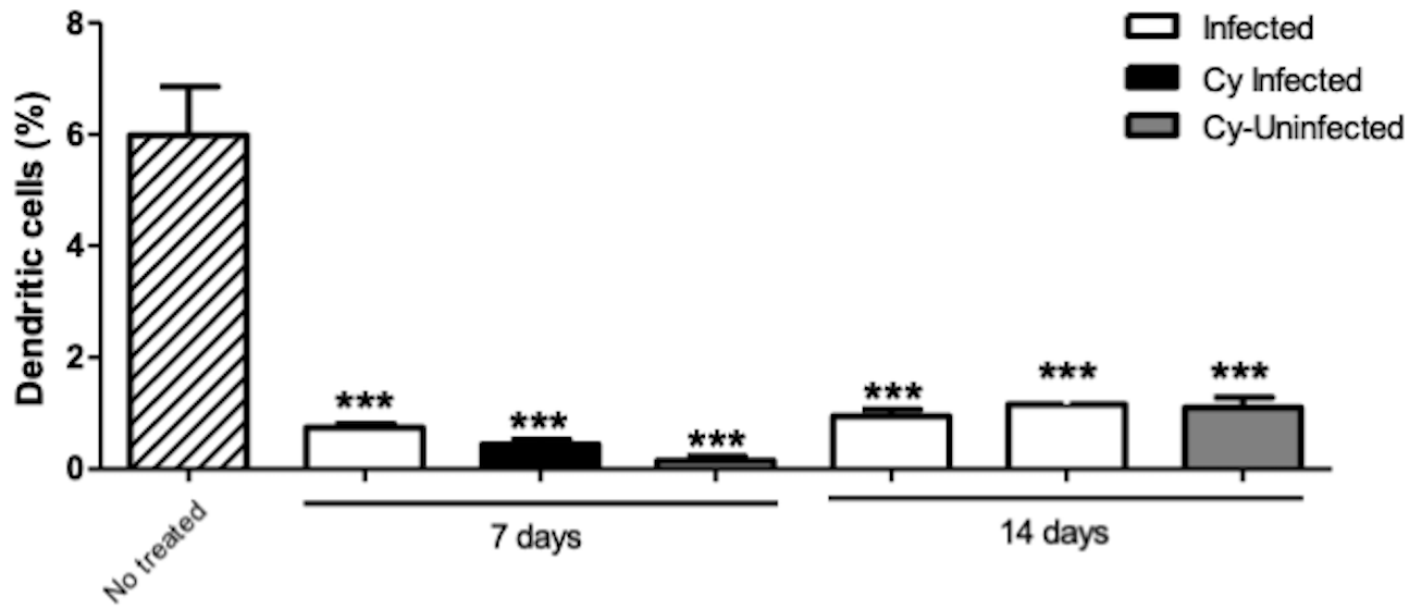

b

Infected

Cy-Infected

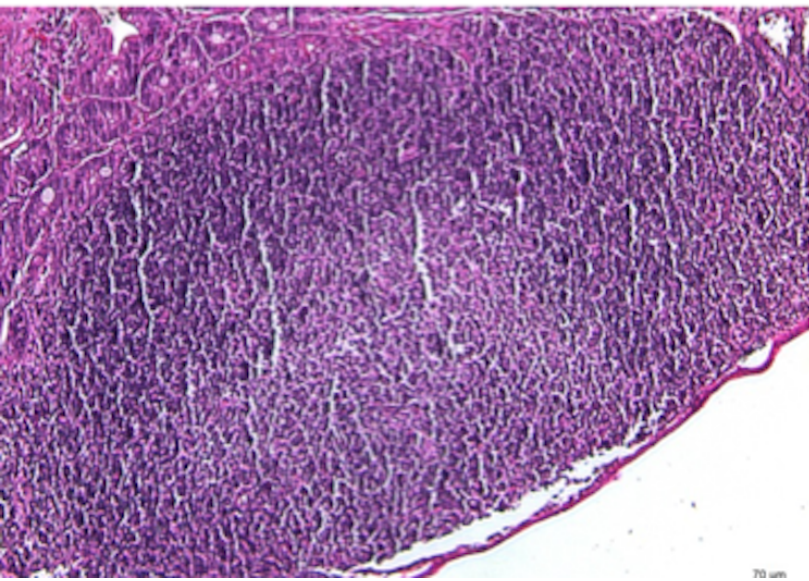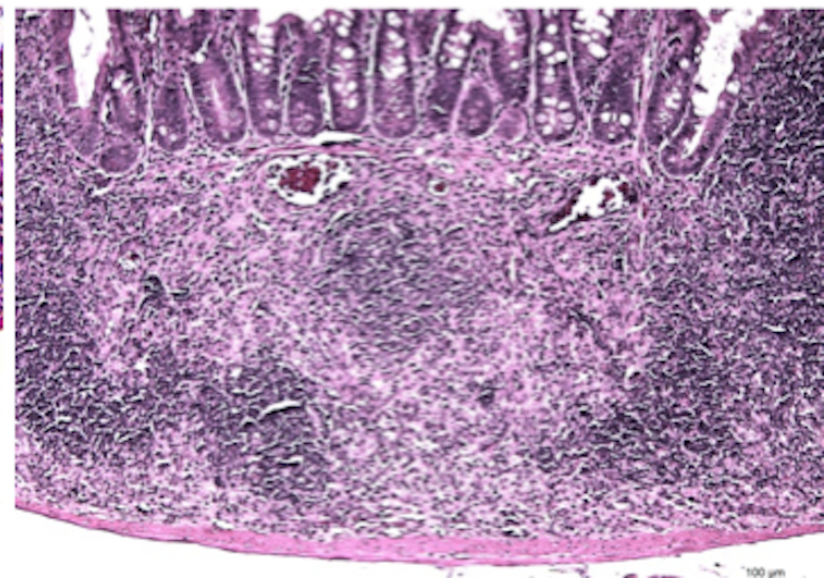

## Mesenteric lymph nodes

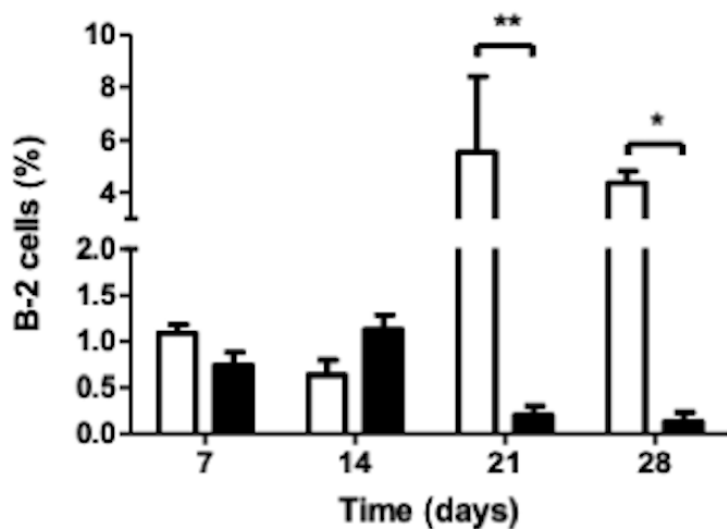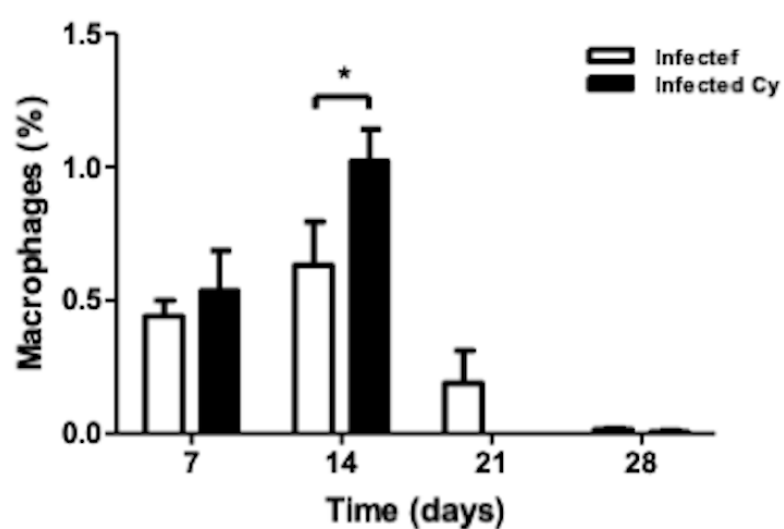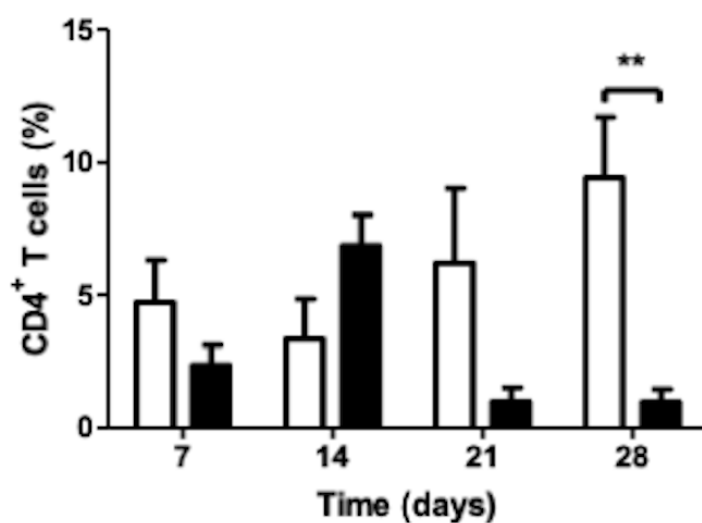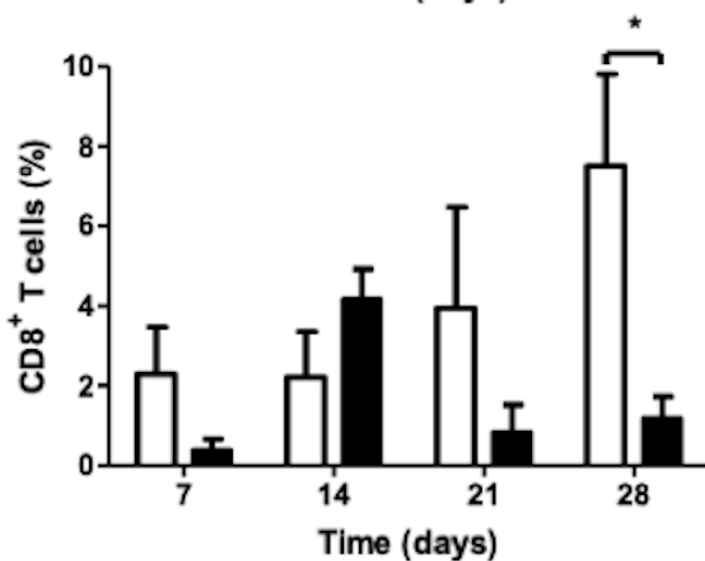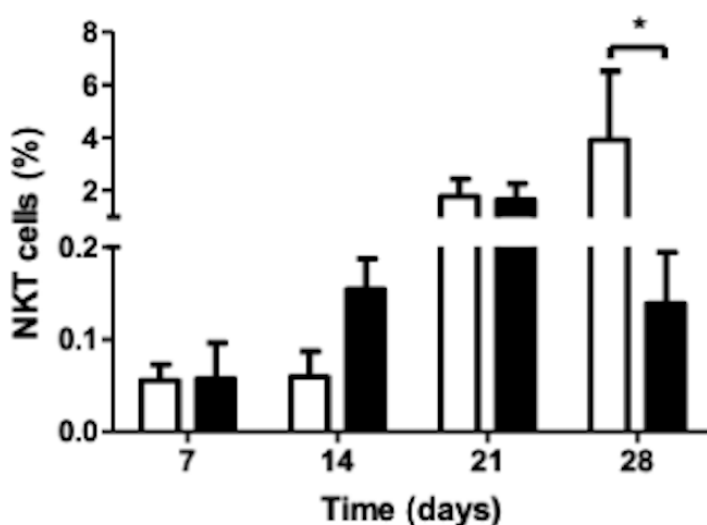

## Peritoneum

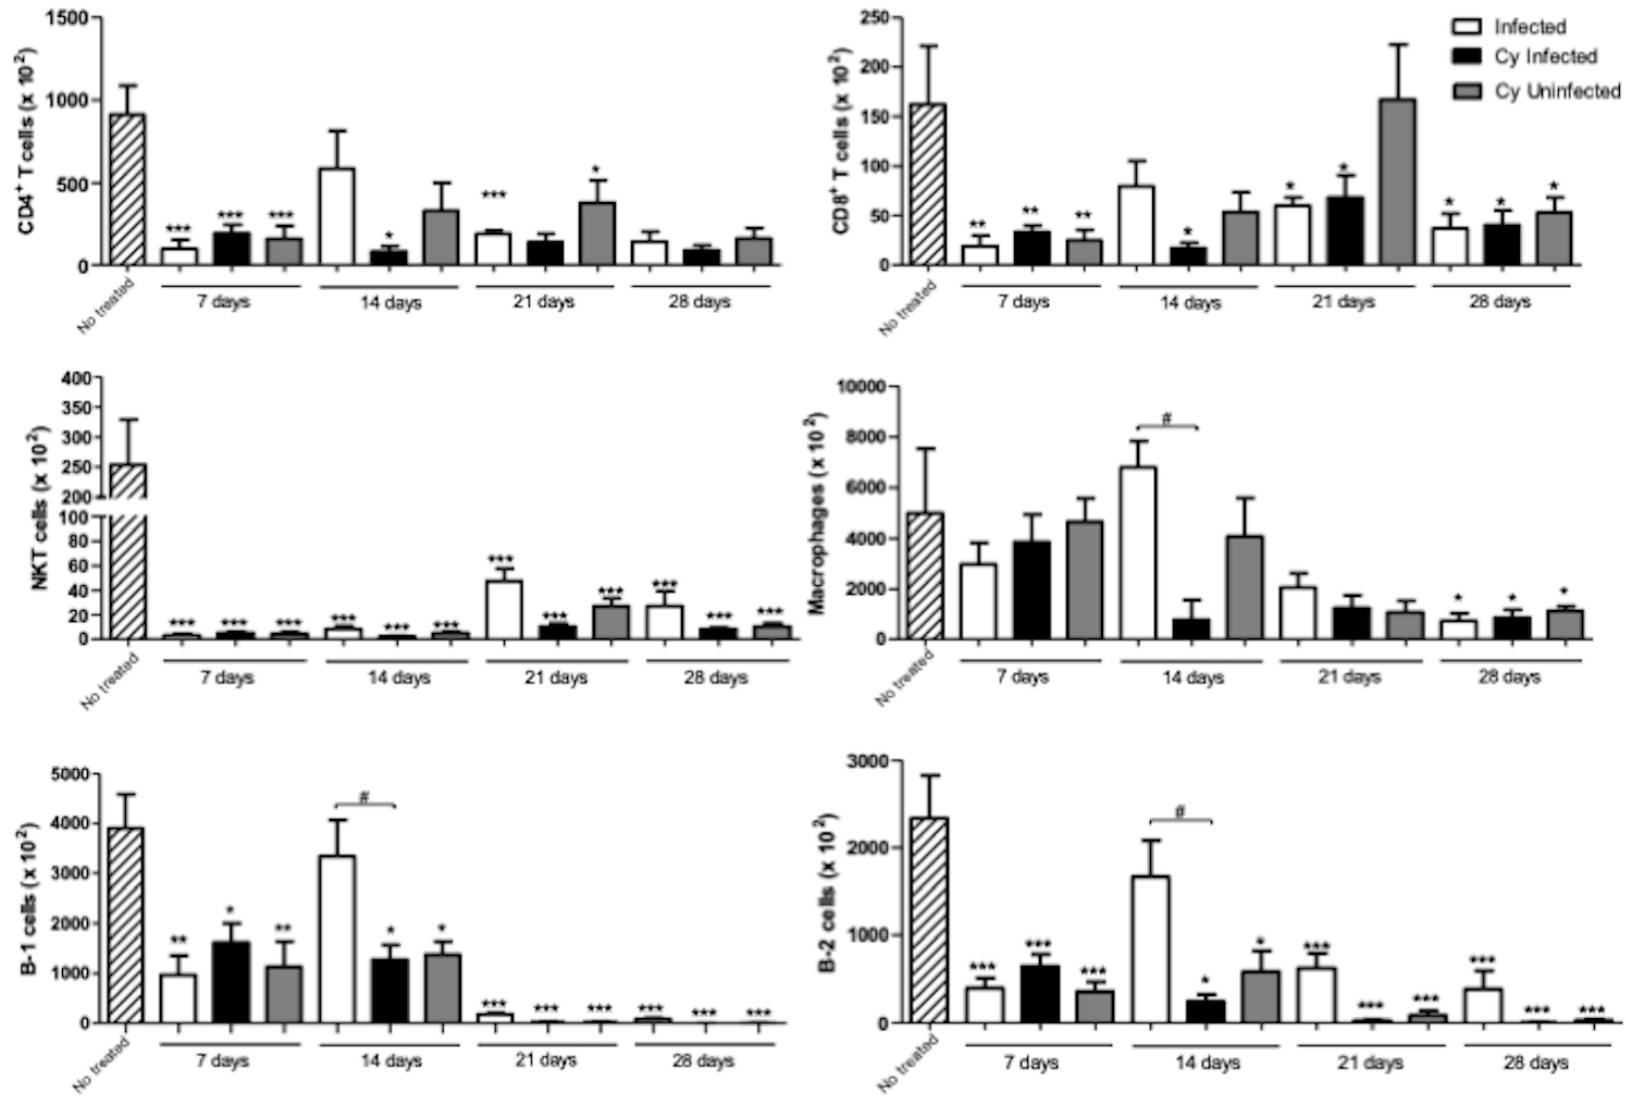

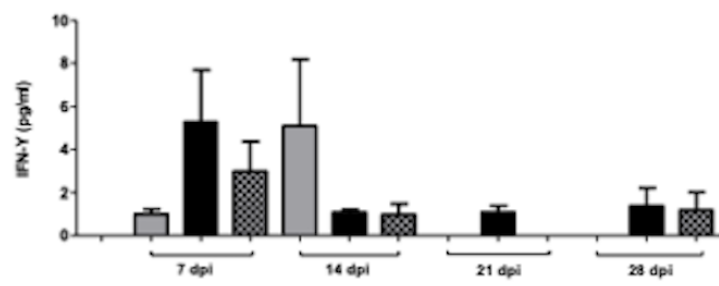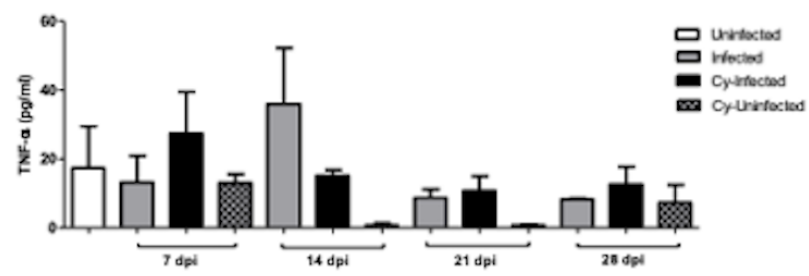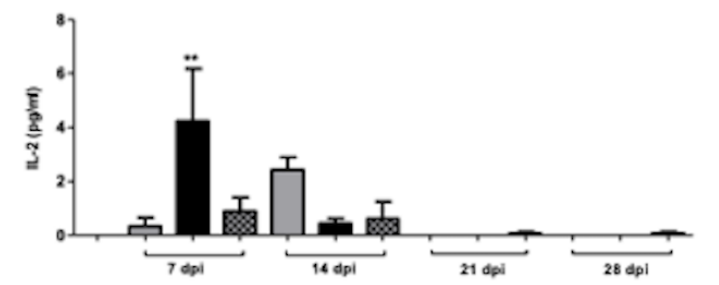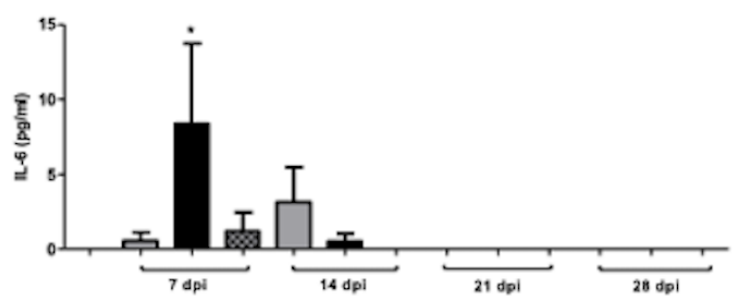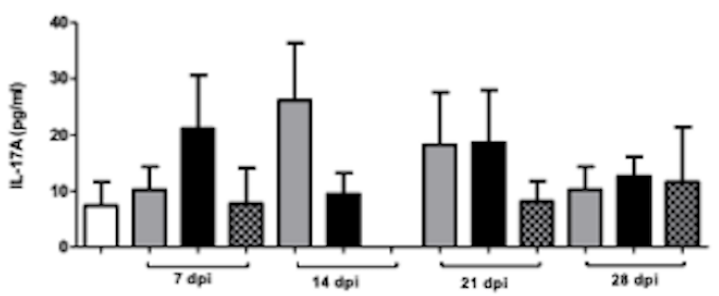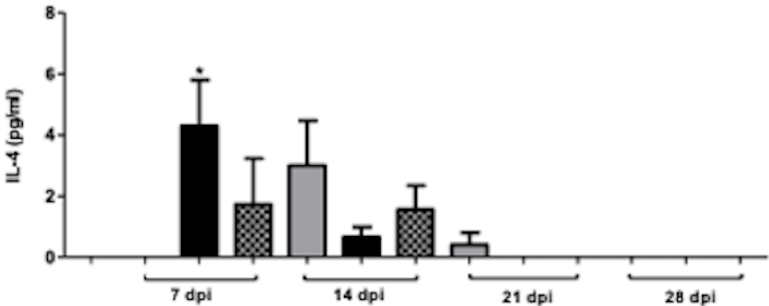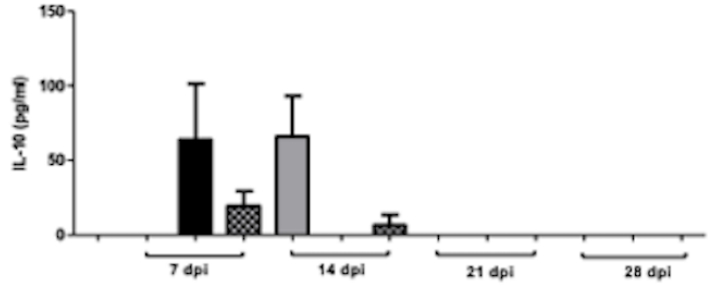

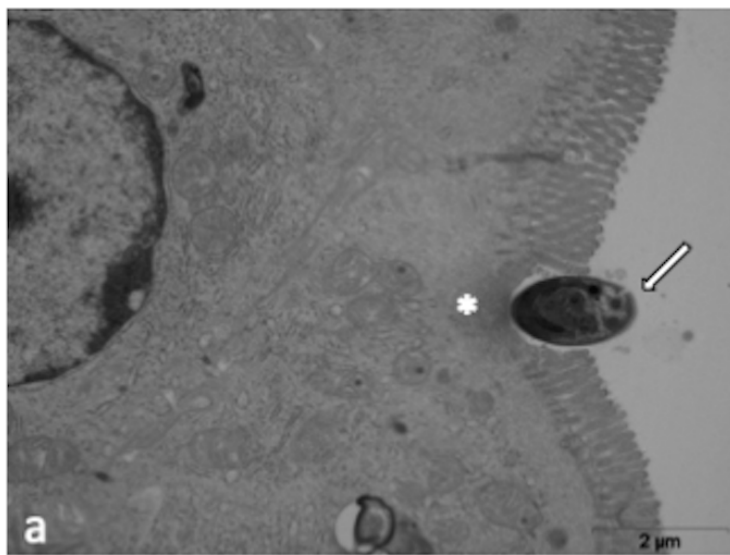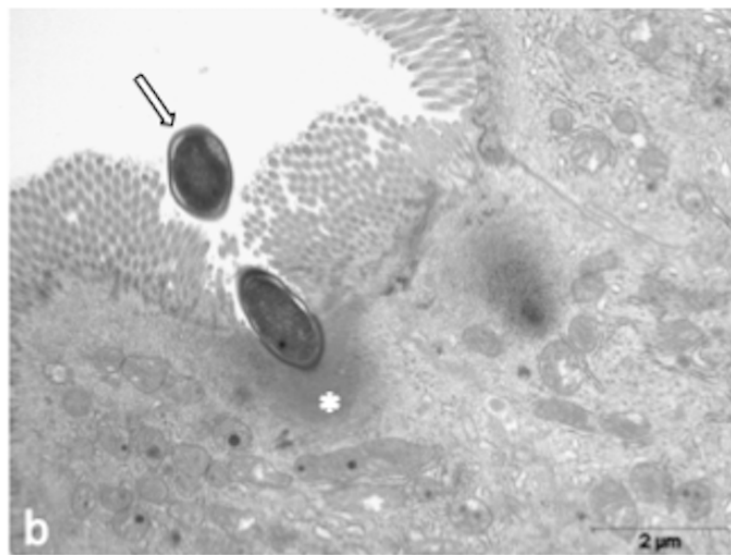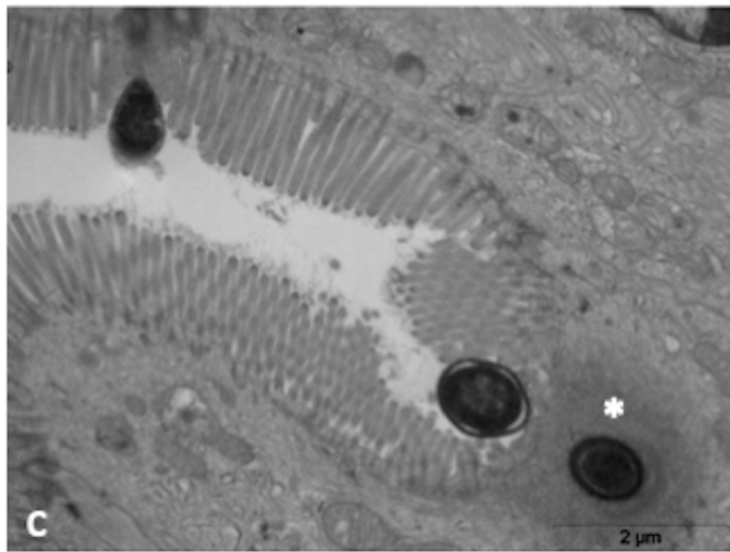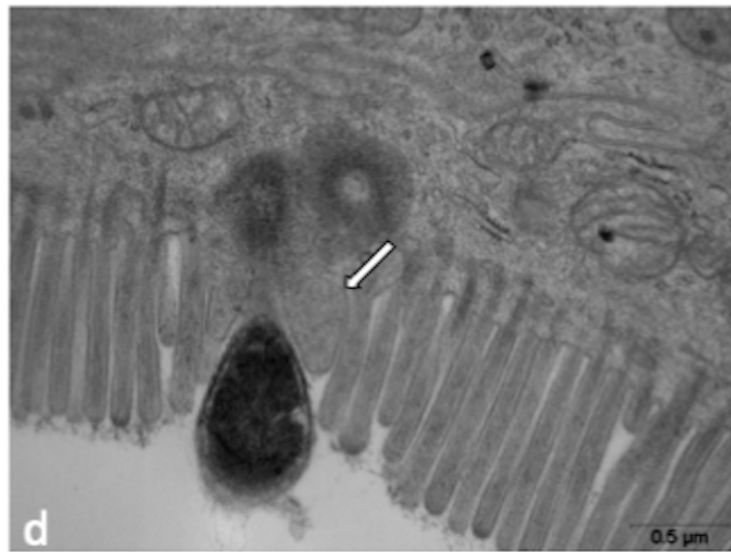

Source: https://www.biorxiv.org/content/10.1101/611988v1.full.pdf
